# Supplementary material for: Particle dispersion through porous media with heterogeneous attractions
Source: Royal Society of Chemistry journal article supplement (doi:10.1039/d3sm01166f), 2024-01-01
Supplement: d3sm01166f1.pdf [file d3sm01166f1.pdf]

## Particle dispersion through porous media with heterogeneous attractions

Wilfred Kwabena Darko,<sup>a</sup> Deepak Mangal,<sup>b</sup> Jacinta C. Conrad,<sup>a</sup> and Jeremy C. Palmer\*<sup>a</sup>

---

<sup>a</sup> Department of Chemical and Biomolecular Engineering, University of Houston, Houston, Texas, 77204, USA. E-mail: jcpalmer@uh.edu

<sup>b</sup> Department of Mechanical and Industrial Engineering, Northeastern University, Boston, 02115, USA.

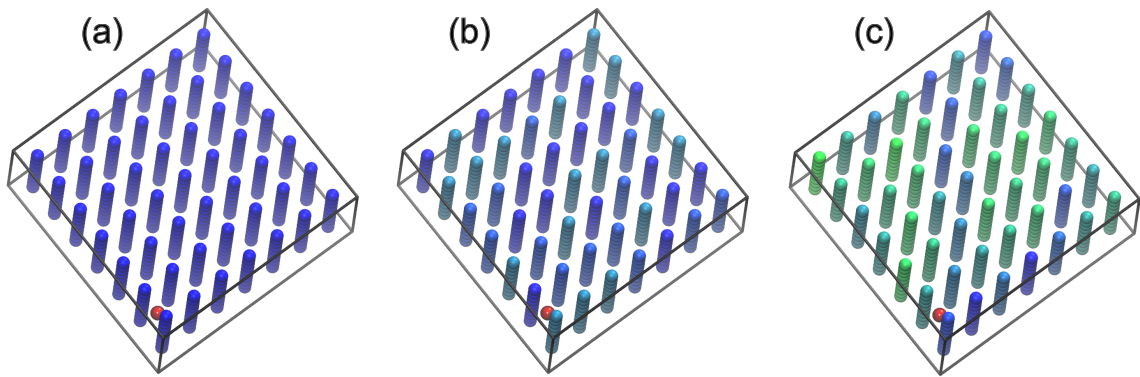

**Fig. S1** Schematic illustration of  $7 \times 7$  subsections of  $100 \times 100$  nanostack arrays with well depth  $u_0 = 5$  and heterogeneity parameter  $\beta =$  (a) 0, (b) 2, and (c) 5.

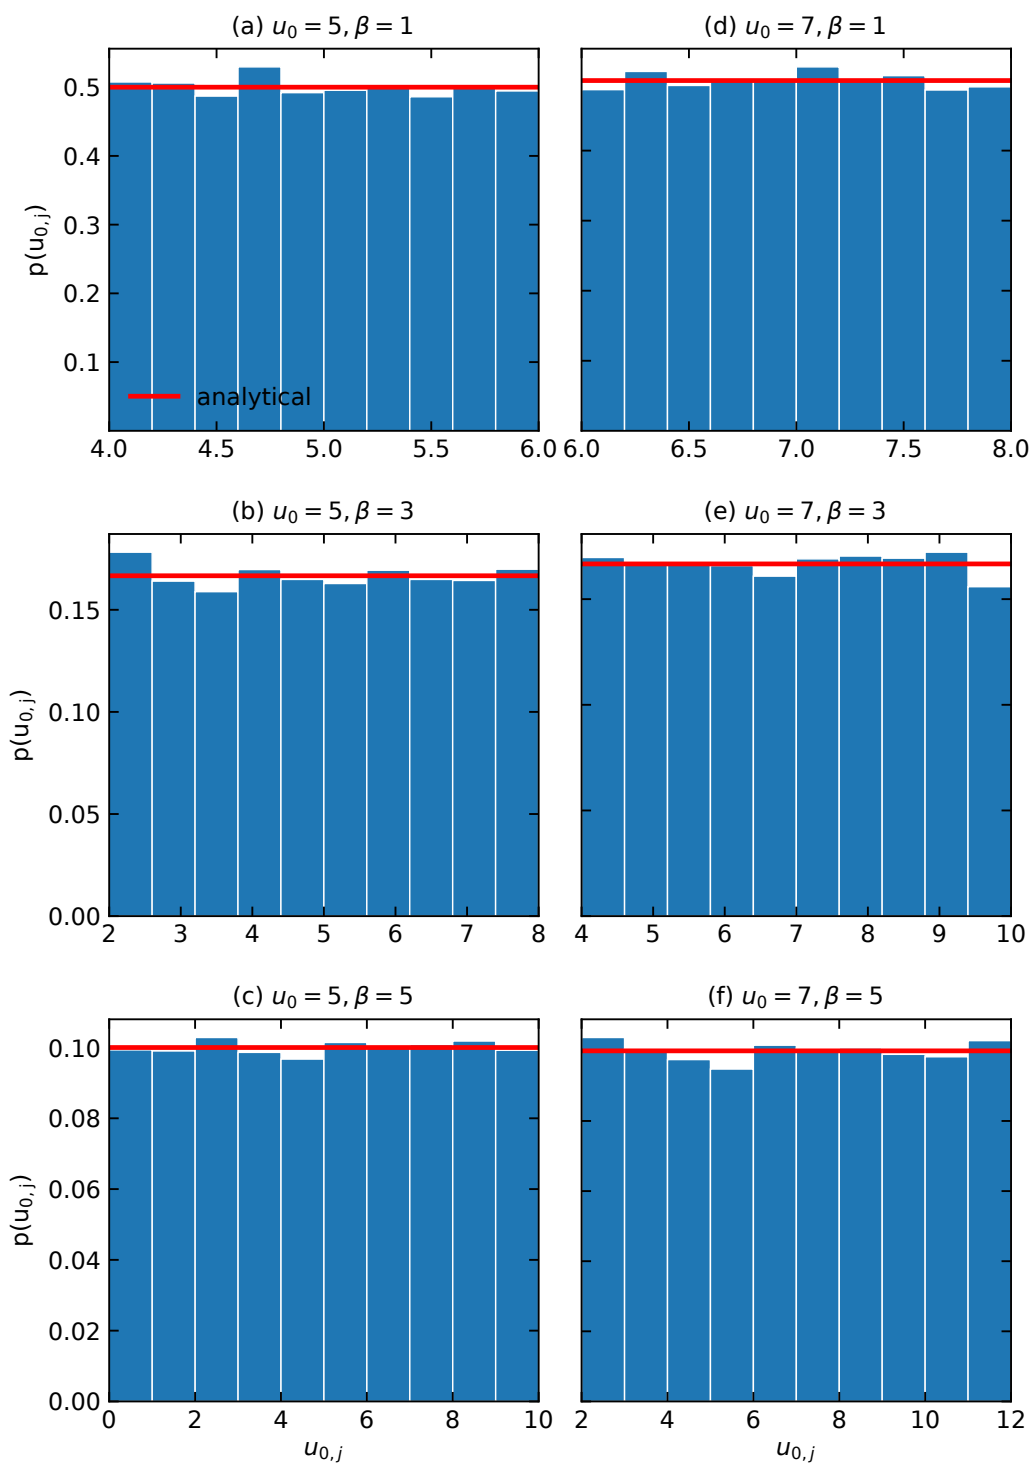

**Fig. S2** Histograms of the interaction energy distributions for (a),(b),(c)  $u_0 = 5$ , and (d),(e),(f)  $u_0 = 7$  for (a),(d)  $\beta = 1$ , (b),(e)  $\beta = 3$  and (c),(f)  $\beta = 5$ . The red line is the analytical result for a uniform distribution  $u_0 \mathcal{U}(1-\beta, 1+\beta)$ .

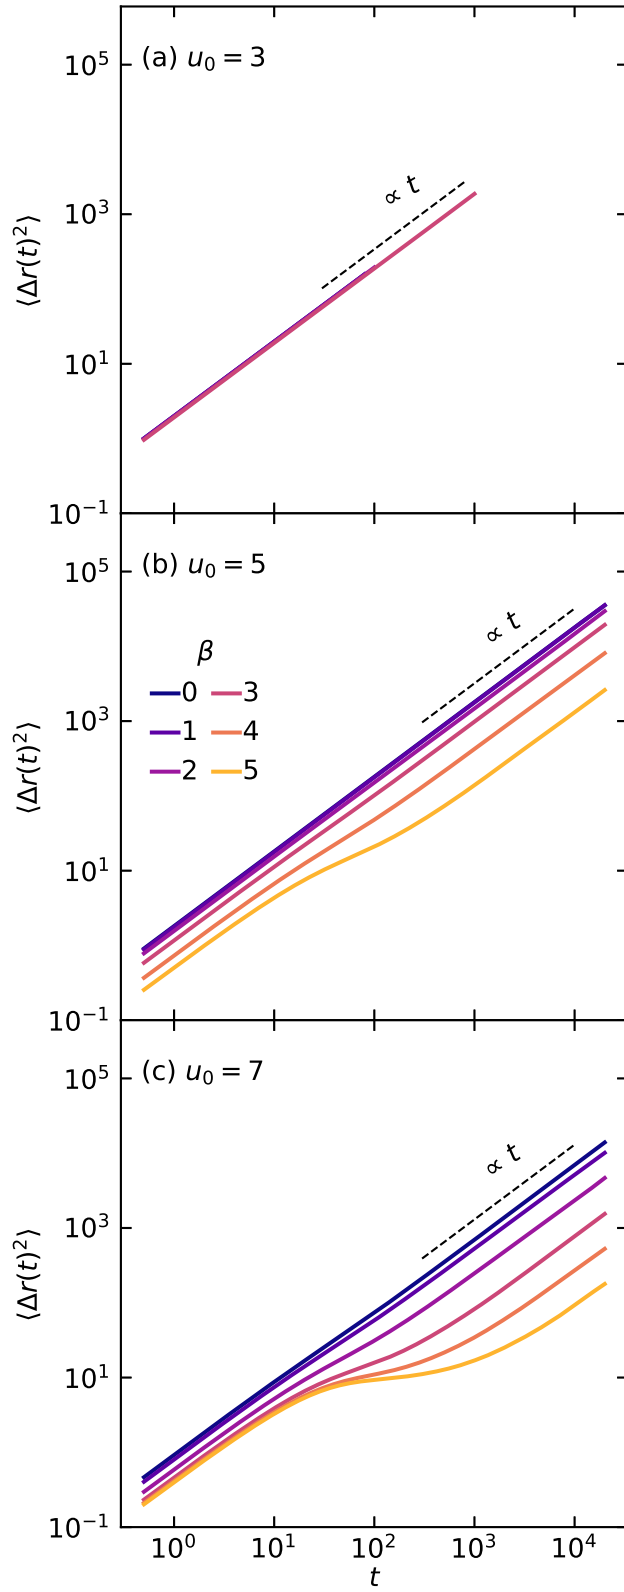

**Fig. S3** Mean-squared displacements  $\langle \Delta r^2(t) \rangle$  as functions of lag time  $t$  in nanopost arrays with  $\phi = 0.014$  and  $u_0 =$  (a) 3, (b) 5, and (c) 7. The dashed lines are references indicating  $\propto t$  scaling. The legend in (b) applies to all panels.

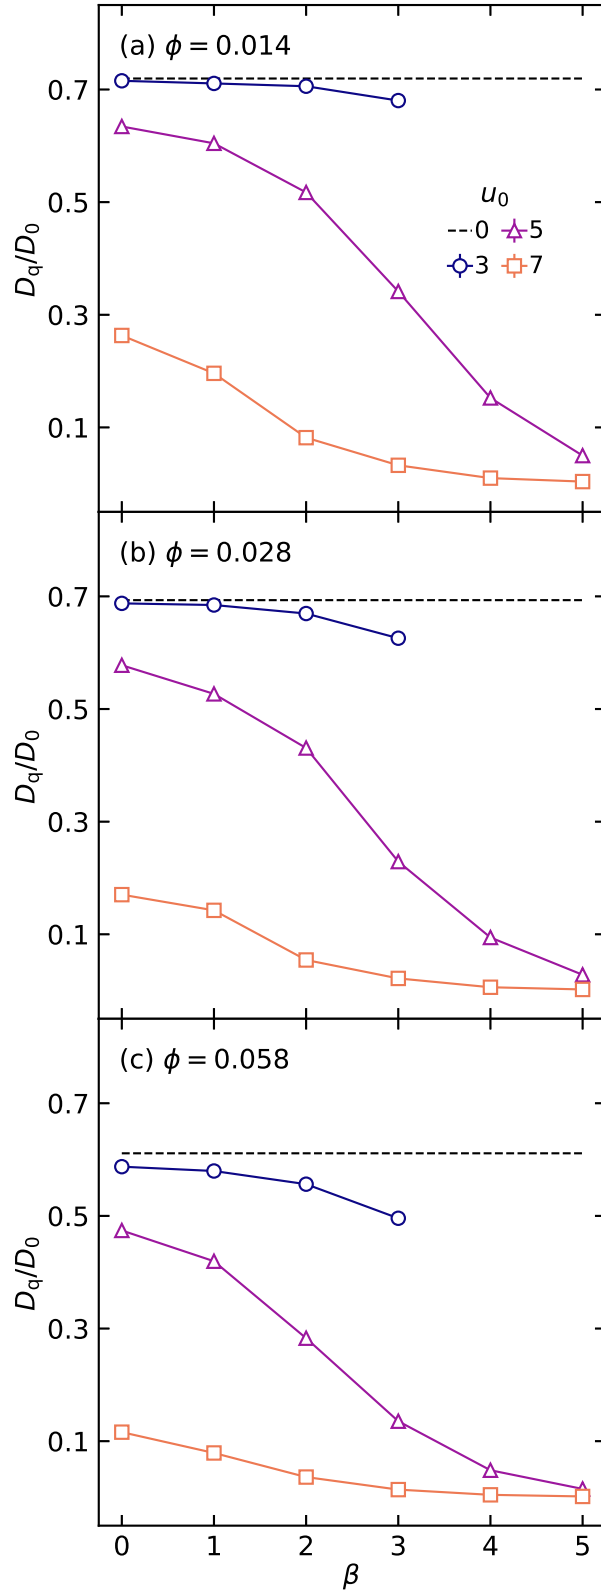

**Fig. S4** Normalized diffusion coefficients  $D_q/D_0$  as functions of the heterogeneity parameter  $\beta$  in nanopost arrays with  $\phi =$  (a) 0.014, (b) 0.028, and (c) 0.058. The dashed lines indicate the values of  $D_q/D_0$  for cases where  $u_0 = 0$ . The legend in (a) applies to all panels. Estimated uncertainties are smaller than the symbol sizes.

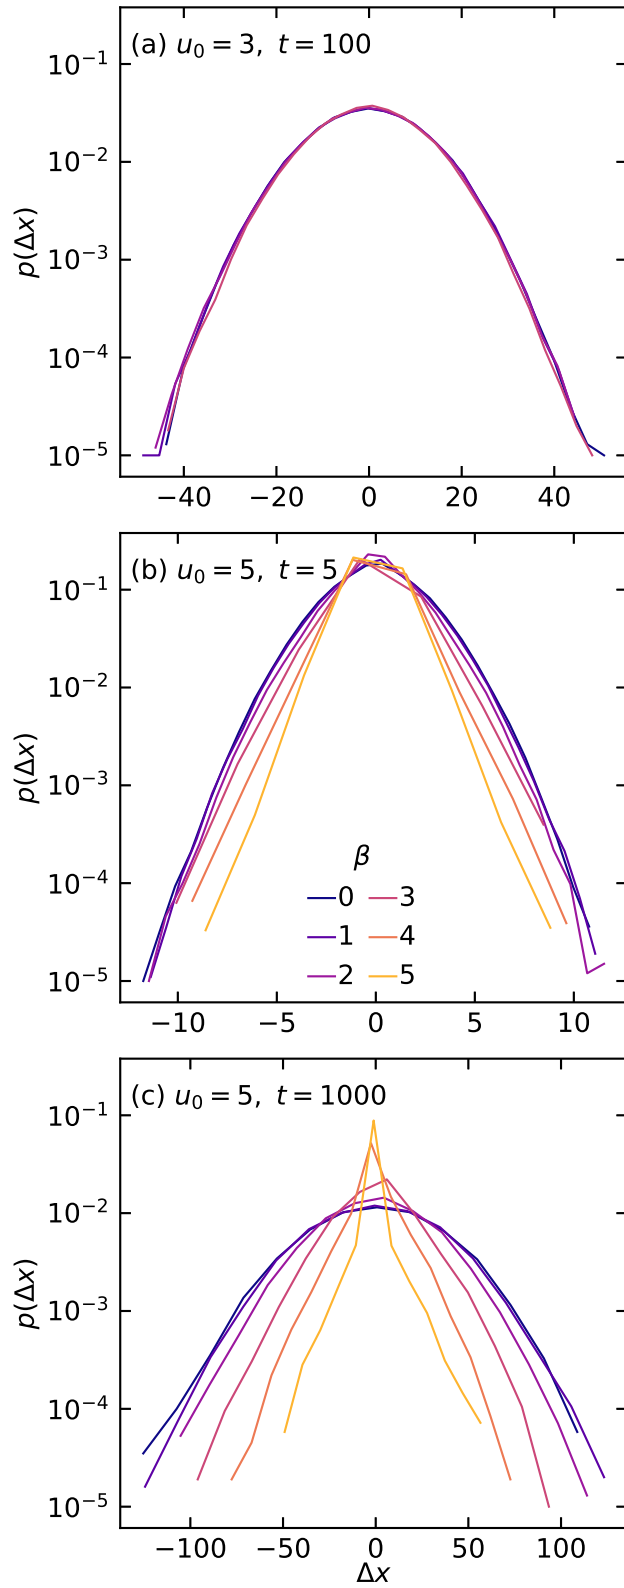

**Fig. S5** Particle displacement distributions at different lag times  $t$  for nanopost arrays with  $\phi = 0.028$  and  $u_0 =$  (a) 3 and (b),(c) 5. The lag times are chosen to lie within the different diffusive regimes observed in the corresponding MSDs. The legend in (b) applies to all panels.

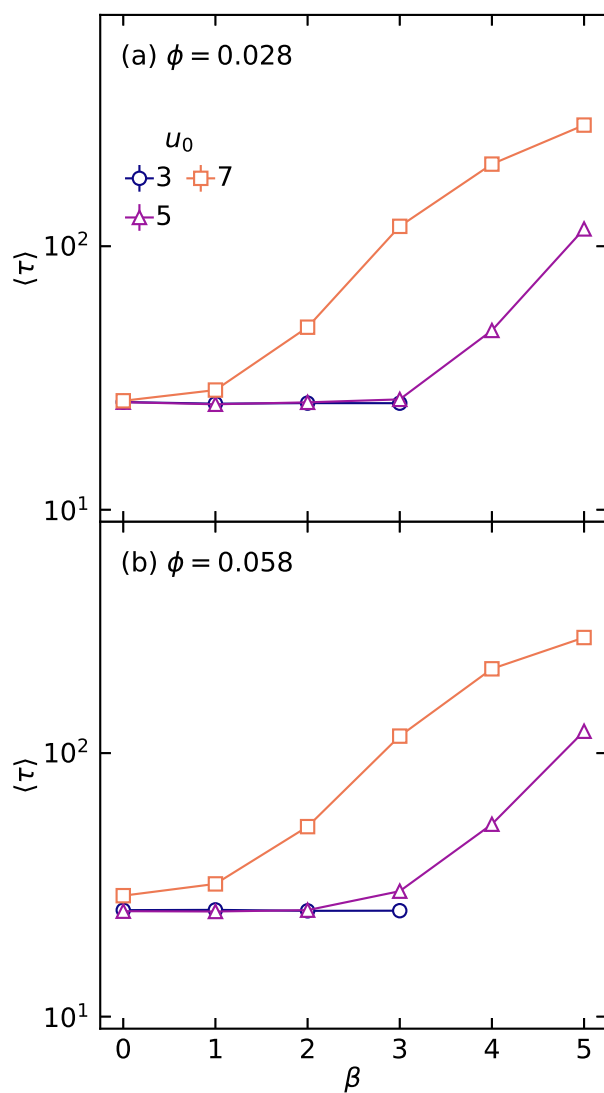

**Fig. S6** Tortuosities  $\langle \tau \rangle$  as functions of the heterogeneity parameter  $\beta$  in nanopost arrays with  $\phi =$  (a) 0.028 and (b) 0.058. The legend in (a) applies to both panels. Estimated uncertainties are smaller than the symbol sizes.

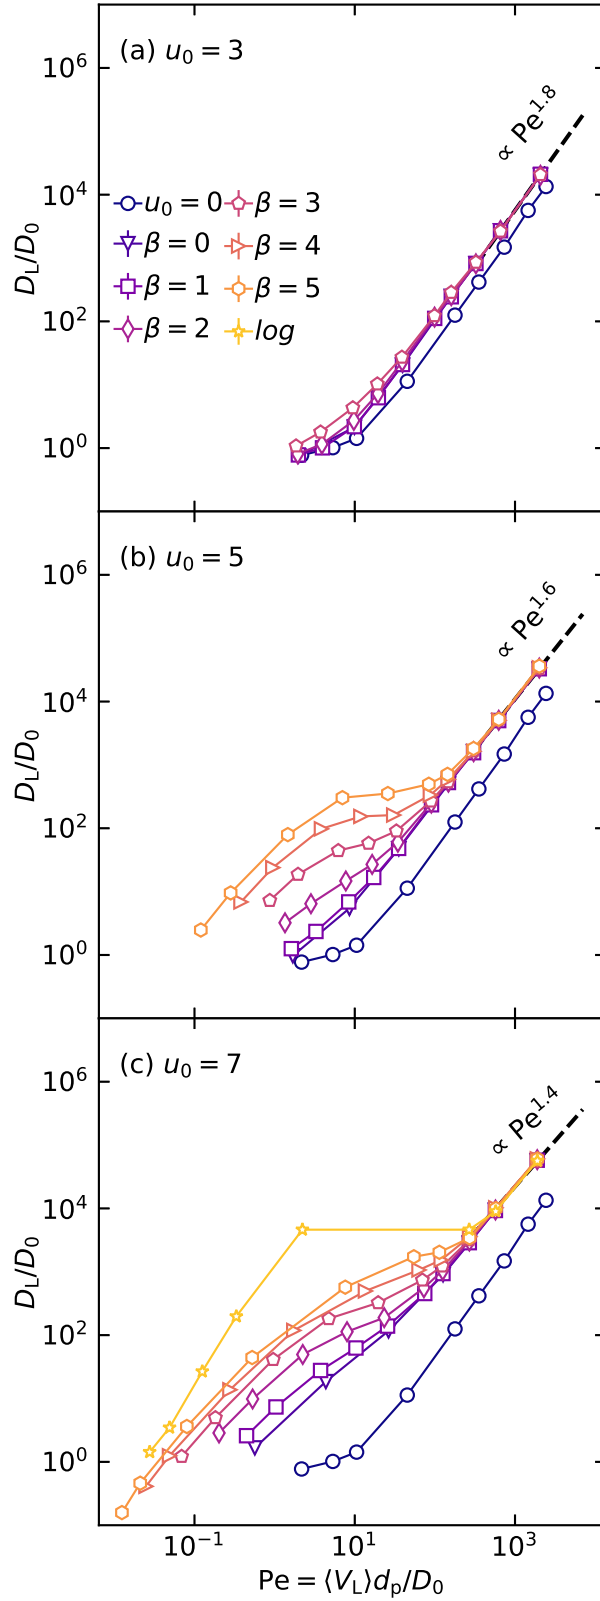

**Fig. S7** Normalized longitudinal dispersion coefficients  $D_L/D_0$  as functions of  $Pe$  for nanopost arrays with  $\phi = 0.028$  and  $u_0 =$  (a) 3, (b) 5, and (c) 7. Panel (c) also shows the results for the case where the system's heterogeneity follows a lognormal distribution,  $Y \sim \text{Lognormal}(u_0, \beta^2)$ , and  $\beta = 2$  in this instance. The legend in (a) applies to all panels. Estimated uncertainties are smaller than the symbol sizes.



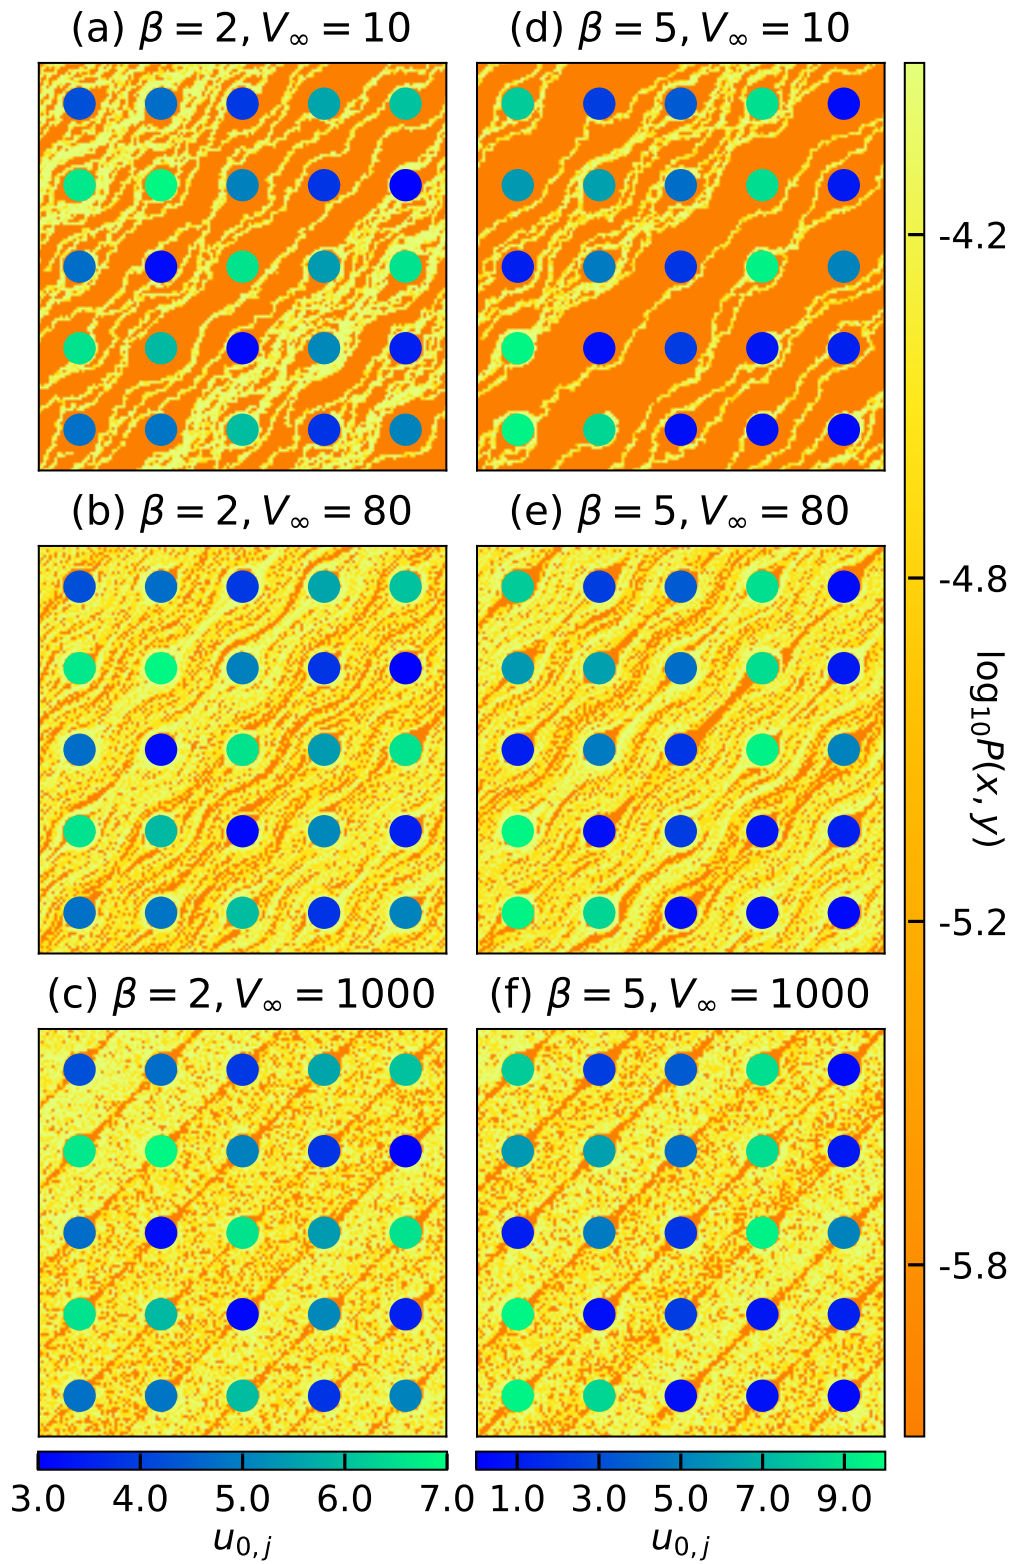

**Fig. S8** Log-probability density distributions of particle positions  $\log_{10} P(x, y)$  at flow rates  $V_\infty =$  (a),(d) 10, (b),(e) 80, and (c),(f) 1000 in  $5 \times 5$  subsections of nanopost arrays with  $\phi = 0.028$ ,  $u_0 = 5$ , and heterogeneity parameter  $\beta =$  (a),(b),(c) 2 and (d),(e),(f) 5. The nanoposts are colored using a blue-to-green scheme to indicate increasing well depth  $u_{0,j}$ .

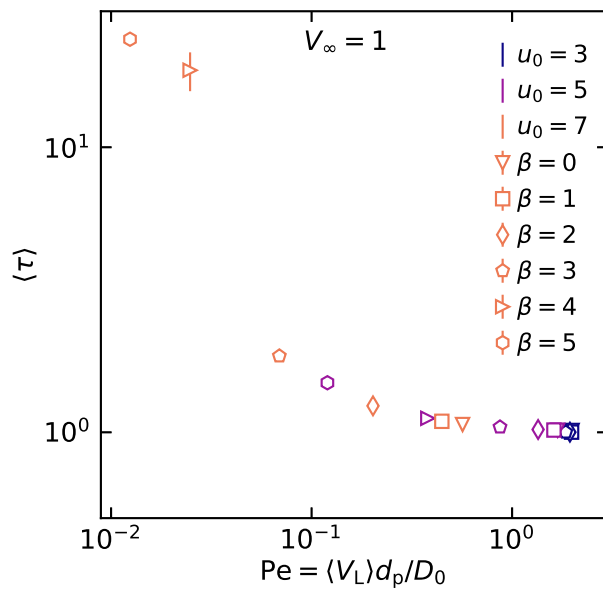

**Fig. S9** Tortuosities  $\langle \tau \rangle$  as functions of  $Pe$  for low flow rate  $V_\infty = 1$  in nanopost arrays with  $\phi = 0.028$ . The symbols correspond to  $\beta$  and are the same across  $u_0$ . The symbols and colors denote different values of  $\beta$  and  $u_0$ , respectively.

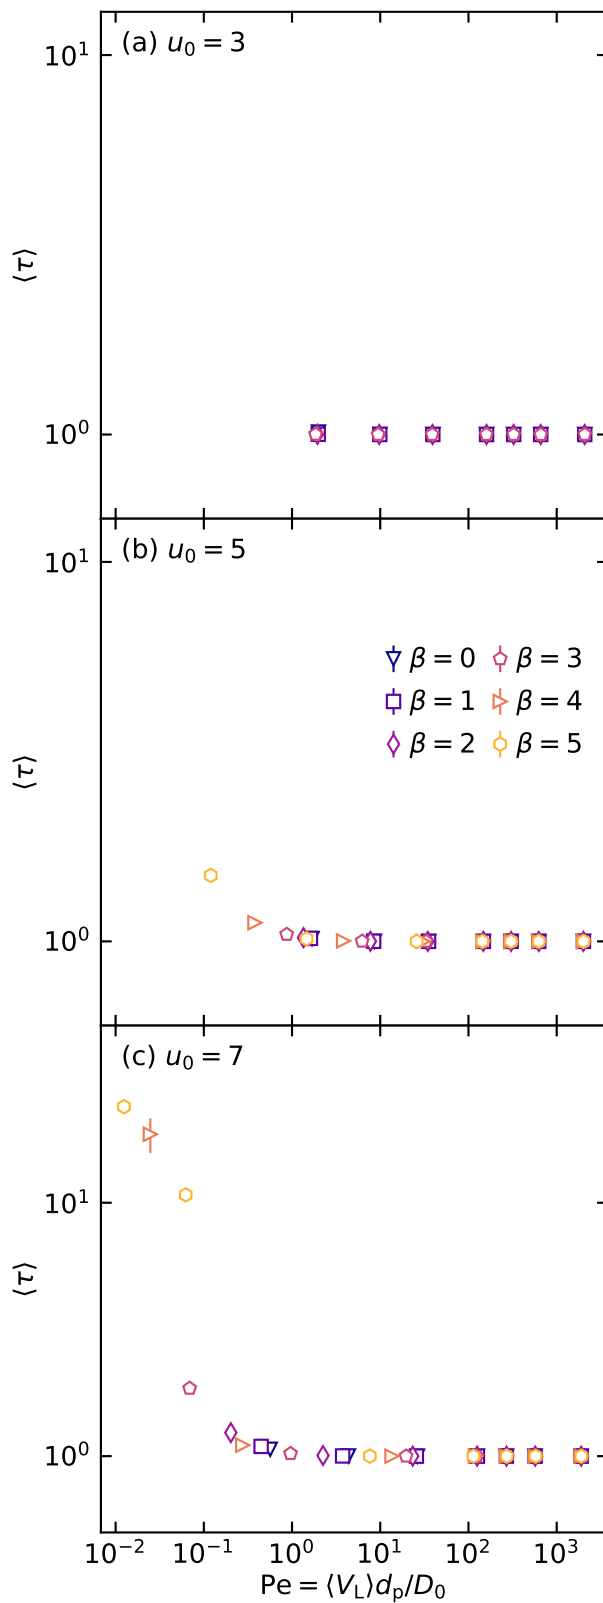

**Fig. S10** Tortuosities  $\langle \tau \rangle$  as functions of  $Pe$  in nanopost arrays with  $\phi = 0.028$  and  $u_0 =$  (a) 3, (b) 5, and (c) 7. The legend in (b) applies to all panels.

Supporting Movie 1: This movie has been referred as ESI Movie 1 in the main text and has the file name Movie1.mpg. It shows normal diffusion through the void space in a nanopost array with  $u_0 = 0$  and  $\beta = 0$ . As described in the main text, the simulations were performed under dilute conditions, and the movie shows trajectories for multiple independent simulations that have been overlaid.

Supporting Movie 2: This movie has been referred as ESI Movie 2 in the main text and has the file name Movie2.mpg. It shows hopping diffusion between nanoposts in a system with  $u_0 = 5$  and  $\beta = 0$ . As described in the main text, the simulations were performed under dilute conditions, and the movie shows trajectories for multiple independent simulations that have been overlaid.
